# Supplementary material
Source: PubMed Central journal article supplement (PMC4405661)

# Supplemental Figure 1

## A. Schematic for isolation and assessment of C2 hiPSC-ECs

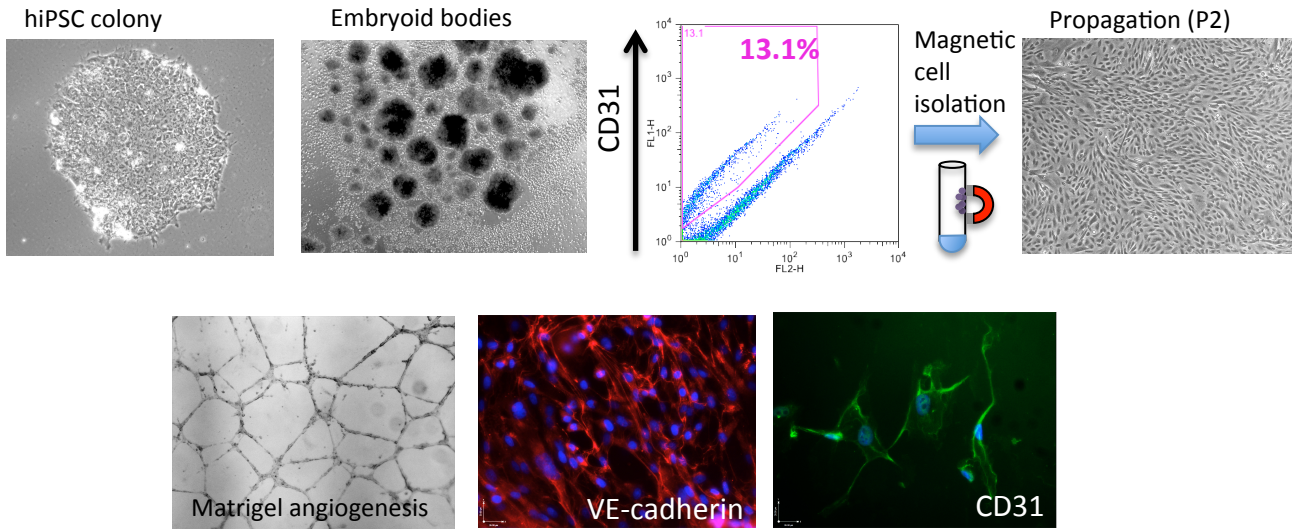

Supplement: NIHMS670076-supplement-1.pdf [file NIHMS670076-supplement-1.pdf]

# Supplemental Figure 2

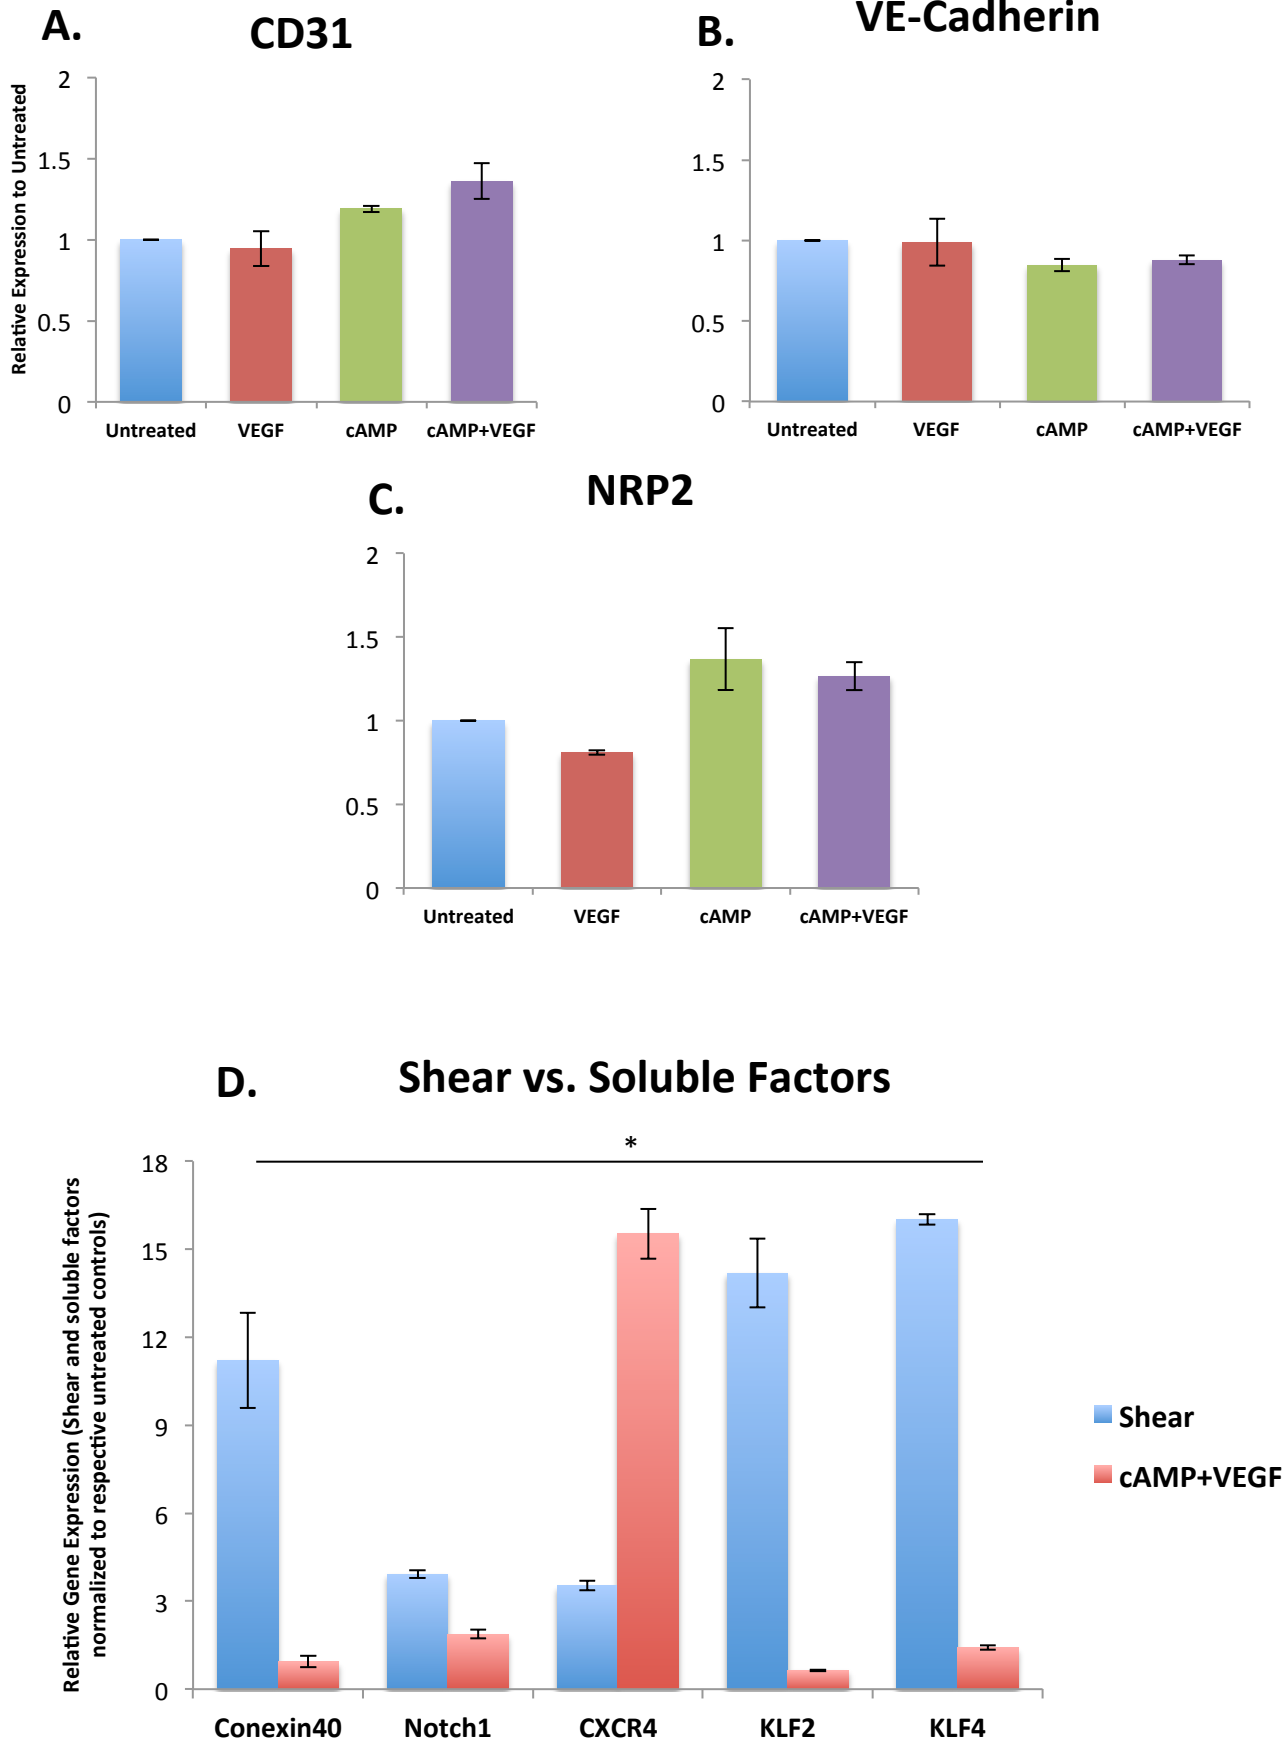

Supplement: NIHMS670076-supplement-2.pdf [file NIHMS670076-supplement-2.pdf]
